# Supplementary material for: Dissolution of Zinc Oxide Nanoparticles in the Presence of Slow Acid Generators
Source: MDPI journal article supplement (doi:10.3390/ma15031166), 2022-02-02
Supplement: s1 [file s1]

*Supplemental Materials*

# Dissolution of Zinc Oxide Nanoparticles in the Presence of Slow Acid Generators

Ronny Kürsteiner, Maximilian Ritter, Yong Ding and Guido Panzarasa \*

Wood Materials Science, Institute for Building Materials, ETH Zürich, Laura-Hezner-Weg 7, 8093 Zürich, Switzerland; ronnyk@ethz.ch (R.K.); maxritter@ethz.ch (M.R.); yoding@ethz.ch (Y.D.)

\* Correspondence: guidop@ethz.ch

**Citation:** Kürsteiner, R.; Ritter, M.; Ding, Y.; Panzarasa, G. Dissolution of Zinc Oxide Nanoparticles in Presence of Slow Acid Generators. *Materials* **2022**, *15*, 1166. <https://doi.org/10.3390/ma15031166>

Academic Editor: Alina Pruna

Received: 11 January 2022

Accepted: 30 January 2022

Published: 2 February 2022

**Publisher's Note:** MDPI stays neutral with regard to jurisdictional claims in published maps and institutional affiliations.

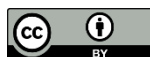

**Copyright:** © 2022 by the authors. Licensee MDPI, Basel, Switzerland. This article is an open access article distributed under the terms and conditions of the Creative Commons Attribution (CC BY) license (<https://creativecommons.org/licenses/by/4.0/>).

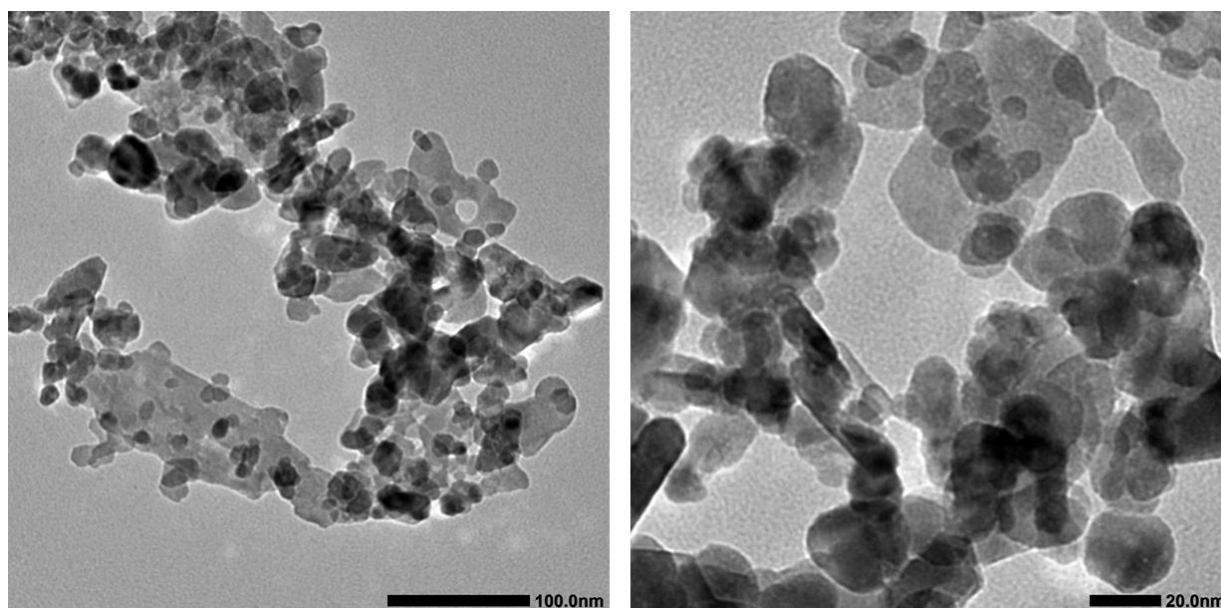

**Figure S1.** Representative TEM images of the ZnO nanoparticles used for the experiments.

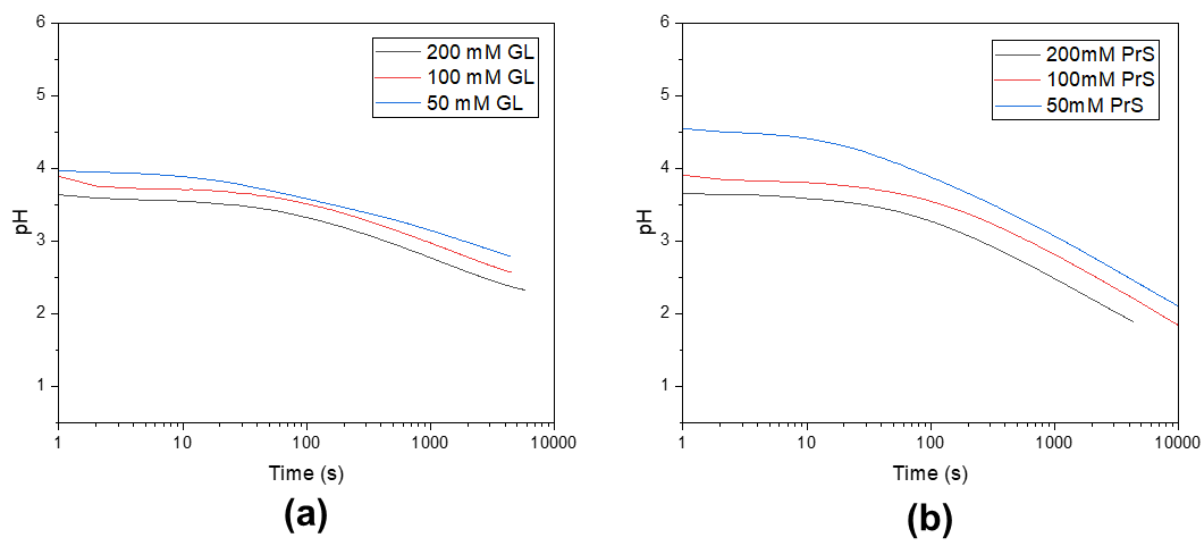

**Figure S2.** pH-Time curves for different concentrations of (a)  $\delta$ -gluconolactone, (b) propanesultone in pure water.

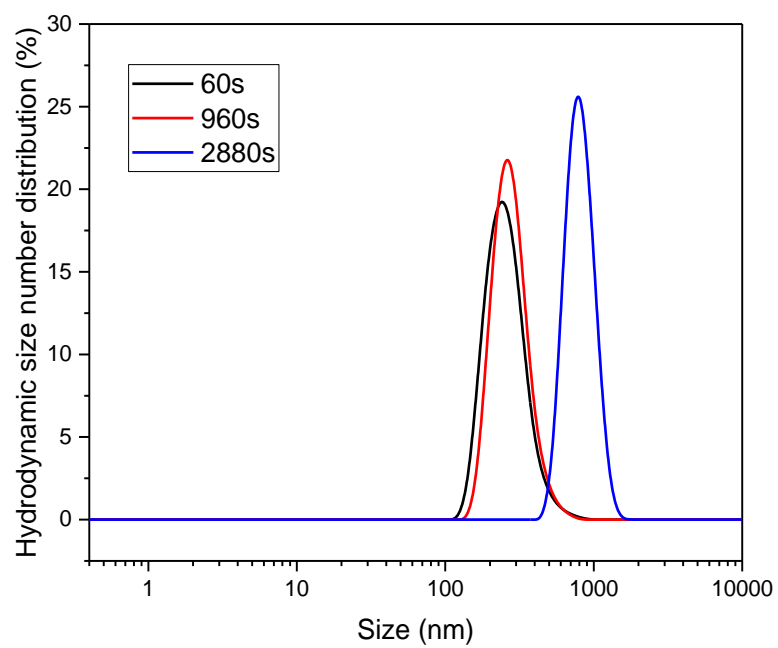

**Figure S3.** DLS curves for the system ZnO-PrS.
